# Supplementary material
Source: PubMed Central journal article supplement (PMC2901854)

Supplementary Figure 1

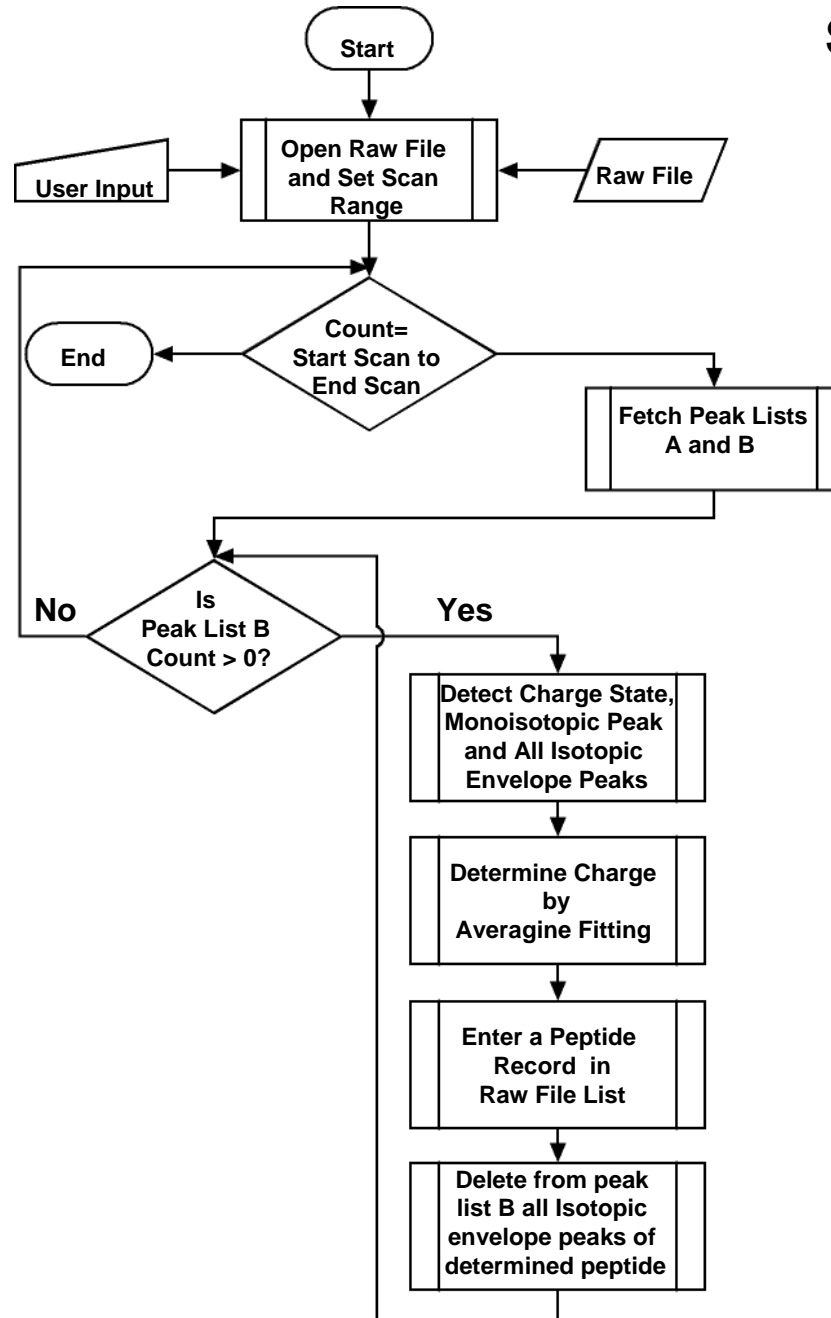

Supplement: NIHMS201117-supplement-Figure_1.pdf [file NIHMS201117-supplement-Figure_1.pdf]

Supplementary Figure 2

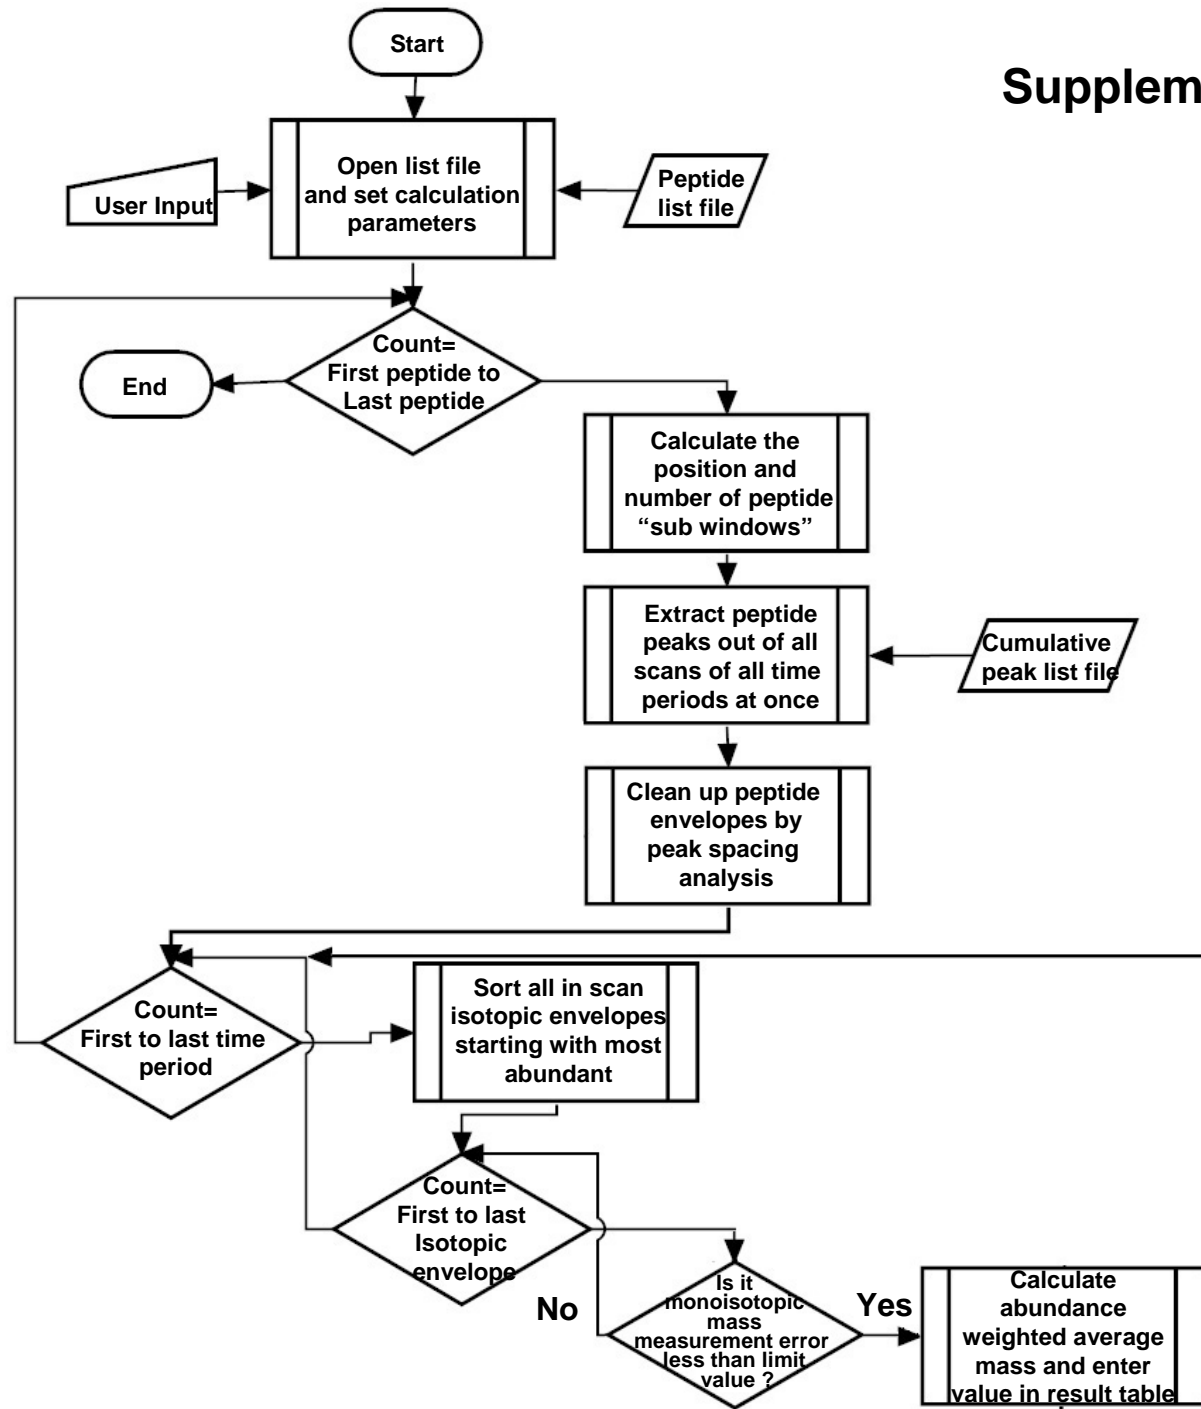

Supplement: NIHMS201117-supplement-Figure_2.pdf [file NIHMS201117-supplement-Figure_2.pdf]
